# Supplementary material
Source: Springer Nature journal article supplement (https://www.springermedizin.de/resource/supplementary/12888_2012_1208_MOESM1_ESM.pdf/9479360)
Supplement: MOESM1 [file 9479360]

THIN Database

4,530 with an ADHD diagnosis and prescription for study drug on the database between 2003 and 2008

3,626—1 treatment episode

904 >1 treatment episodes

2,376 started between 6–12 years

898 started between 13–17 years

352 started <6 years or  $\geq 18$  years

213 had data on database into adulthood ( $\geq 18$  years)

397 had data on database into adulthood ( $\geq 18$  years)
